# Supplementary material for: N-Methylene-C bridged tetrazole and 1,2,4-triazole energetic salts as promising primary explosives
Source: Royal Society of Chemistry journal article supplement (doi:10.1039/d3ce01051a), 2023-11-21
Supplement: d3ce01051a1.pdf [file d3ce01051a1.pdf]

## N-methylene-C bridged tetrazole and 1,2,4-triazole energetic salts as promising primary explosives

Lingfeng Zhang,<sup>a</sup> Yu Wang,<sup>b</sup> Yefeng Wang,<sup>a</sup> Shuai Liu,<sup>a</sup> Na Zhang,<sup>b</sup> Mingmin Yang,<sup>c</sup>  
Haixia Ma,<sup>a</sup> Zhaoqi Guo<sup>\*,a</sup>

<sup>a</sup> School of Chemical Engineering / Xi'an Key Laboratory of Special Energy Materials,  
Northwest University, Xi'an 710069, Shaanxi, P. R. China.

<sup>b</sup> Xi'an North Hui An Chemical Industries Co. Ltd, Xi'an 710302, P. R. China.

<sup>c</sup> State Key Laboratory of NBC Protection for Civilian, Beijing, 102205, P. R. China

### Table of Contents

1. General methods.
2. Synthesis of compound **1**
3. Hydrogen bonds for **2**, **3**, **4**, **6** and **7**. (Table S1–S5)
4. Bond lengths (Å) and angles (°) for **2**, **3**, **4**, **6** and **7**. (Table S6–S10)
5. Detailed calculation procedure of IGM analyses and the iso-surfaces of IGM analyses of **2(a)**, **3(b)**, **4(c)**, **6(d)** and **7(e)** (Figure S1)
6. Detailed calculation of enthalpies of formation. (Table S11)
7. Schematic diagram of electric initiation device. (Figure S2)
8. Gif picture of ignition of RDX
9. References.

## 1. General methods

All the reagents were obtained from commercial sources and used without further purification. TGA measurements were carried out on a METTLER TOLEDO TGA/DSC 3+ instrument with a heating rate of 10 K·min<sup>-1</sup> under an argon atmosphere at a flow rate of 50 ml·min<sup>-1</sup>. DSC were determined on a METTLER TOLEDO DSC 3 at a heating rate of 10 °C·min<sup>-1</sup> in a N<sub>2</sub> atmosphere with a flow rate of 50 mL·min<sup>-1</sup> under ambient atmospheric pressure. Impact sensitivities (IS) were measured on a home-made device according to the UN Recommendations on the Transport of Dangerous Goods, Manual of Tests and Criteria. Single-crystal X-ray diffraction patterns of complexes **2**, **3**, **4**, **6** and **7** were recorded on a Bruker APEX-II diffractometer with highly oriented graphite crystal monochromated Mo K $\alpha$  radiation ( $\lambda = 0.71073 \text{ \AA}$ ). The structures were solved by direct methods and refined by full-matrix least squares techniques based on  $F^2$ . All non-hydrogen atoms were refined anisotropically. Hydrogen atoms were added according to the theoretical models and refined isotropically. The CCDC numbers of **2**, **3**, **4**, **6** and **7** are 2084803, 2084791, 2084806, 2084805 and 2084804.

## 2. Synthesis of compound 1

BrCN (6.87 g/64.84 mmol) was dissolved in 100 mL anhydrous acetonitrile. To this solution was added NaN<sub>3</sub> (21.07g/0.32mol) portion wise at 0°C. After stirring at 0–5 °C for 4h, the reaction mixture was filtered. Ainoacetonitrile hydrochloride (2.00 g, 21.62 mmol) was dissolved in 10 mL water and NaOH (0.86 g , 21.62 mmol) was added at 0°C. This solution was added to the filtrate dropwise at 0°C. It was allowed to react for 36h and the temperature was slowly raised to room temperature. The product was recrystallized form acetonitrile. Yield 68%, m.p. 170~172 °C.

<sup>1</sup>H NMR (500 MHz, [D<sub>6</sub>]DMSO):  $\delta$  = 5.48, 7.09 ppm; <sup>13</sup>C NMR (125 MHz, [D<sub>6</sub>] DMSO):  $\delta$  = 33.3, 114.6, 155.5 ppm; IR (KBr):  $\tilde{\nu}$  = 3465, 2785, 1605, 1518, 1472, 1416, 1349, 1246, 1118, 1025, 812, 736, 657 cm<sup>-1</sup>; elemental analysis (%) C<sub>3</sub> H<sub>4</sub> N<sub>6</sub> (124.11 g·mol<sup>-1</sup>): C 29.01, H 3.22, N 67.67; found: C 29.00, H 3.24, N 67.66.

## 3. Hydrogen bonds present for 2, 3, 4, 6 and 7

**Table S1.** Hydrogen bonds present in **2**

| D–H...A     | d(D–H)/Å | d(H–A)/Å | d(D–A)/Å | D–H–A/° |
|-------------|----------|----------|----------|---------|
| N5–H5B...O1 | 0.871    | 2.094    | 2.950    | 167.058 |
| O2–H2...N1  | 0.985    | 1.653    | 2.621    | 166.591 |

**Table S2.** Hydrogen bonds present in **3**

| D–H...A       | d(D–H)/Å | d(H–A)/Å | d(D–A)/Å | D–H–A/° |
|---------------|----------|----------|----------|---------|
| N8–H8A...N1   | 0.910    | 2.267    | 2.993    | 136.511 |
| N10–H10B...N6 | 0.874    | 2.115    | 2.972    | 166.290 |
| N10–H10A...N2 | 0.862    | 2.243    | 3.083    | 164.674 |
| N8–H8A...N5   | 0.860    | 2.277    | 3.003    | 142.247 |

**Table S3.** Hydrogen bonds present in **4**

| D–H...A       | d(D–H)/Å | d(H–A)/Å | d(D–A)/Å | D–H–A/° |
|---------------|----------|----------|----------|---------|
| N10–H10A...O6 | 0.880    | 1.999    | 2.862    | 166.360 |

|               |       |       |       |         |
|---------------|-------|-------|-------|---------|
| N6-H6...O4    | 0.880 | 2.037 | 2.844 | 151.880 |
| N1-H1...O1    | 0.880 | 1.789 | 2.642 | 162.853 |
| N10-H10B...O3 | 0.880 | 2.116 | 2.964 | 161.834 |
| N9-H9B...O5   | 0.881 | 2.288 | 3.149 | 165.592 |
| N8-H8A...O3   | 0.880 | 2.345 | 3.122 | 147.451 |
| N6-H6...O2    | 0.880 | 2.398 | 2.877 | 114.513 |
| N8-H8B...O1   | 0.880 | 2.092 | 2.910 | 154.129 |

**Table S4.** Hydrogen bonds present in **6**

| D-H...A        | d(D-H)/Å | d(H-A)/Å | d(D-A)/Å | D-H-A/° |
|----------------|----------|----------|----------|---------|
| N1-H1...O1     | 0.880    | 2.285    | 2.962    | 108.138 |
| N1-H1...O6     | 0.880    | 2.096    | 2.960    | 167.114 |
| N12-H12C...N10 | 1.074    | 1.861    | 2.841    | 149.809 |
| N12-H12A...O5  | 0.881    | 2.237    | 3.104    | 168.094 |
| N12-H12B...O2  | 0.880    | 1.914    | 2.778    | 167.262 |
| O6-H6A...O7    | 0.868    | 1.958    | 2.826    | 178.537 |
| O7-H7B...N5    | 0.871    | 2.121    | 2.931    | 154.538 |
| O7-H7A...O3    | 0.870    | 2.164    | 2.956    | 151.176 |
| O5-H5...N7     | 0.840    | 1.823    | 2.654    | 169.403 |

**Table S5.** Hydrogen bonds present in **7**

| D-H...A      | d(D-H)/Å | d(H-A)/Å | d(D-A)/Å | D-H-A/° |
|--------------|----------|----------|----------|---------|
| O5-H5A...N5  | 0.865    | 2.083    | 2.945    | 174.262 |
| O5-H5B...O2  | 0.835    | 2.255    | 3.048    | 158.802 |
| O6-H6B...O4  | 0.806    | 2.897    | 3.270    | 110.749 |
| O6-H6A...N10 | 0.804    | 2.236    | 2.997    | 158.226 |

#### 4. Bond lengths (Å) and angles (°) for **2**, **3**, **4**, **6** and **7**

**Table S6.** Selected bond lengths (Å) and angles (°) for **2**

| Compound <b>2</b> |            |        |            |
|-------------------|------------|--------|------------|
| O2C3              | 1.3067(18) | C1N4C2 | 130.50(13) |
| O1C3              | 1.2154(19) | N3N2N1 | 110.92(12) |
| N3N4              | 1.3656(18) | N2N3N4 | 106.31(12) |
| N4C1              | 1.3456(19) | C1N1N2 | 106.51(13) |
| N4C2              | 1.4485(19) | O2C3C2 | 111.36(13) |
| N2N3              | 1.2861(19) | O1C3O2 | 125.56(14) |
| N2N1              | 1.3650(18) | O1C3C2 | 123.08(13) |
| N1C1              | 1.328(2)   | N4C1N5 | 125.55(14) |
| N5C1              | 1.346(2)   | N1C1N4 | 107.60(13) |
| C3C2              | 1.511(2)   | N1C1N5 | 126.85(15) |
| N3N4C2            | 120.40(12) | N4C2C3 | 111.30(12) |
| C1N4N3            | 108.66(12) |        |            |

**Table S7.** Selected bond lengths (Å) and angles (°) for **3**

| <b>Compound 3</b> |            |             |            |
|-------------------|------------|-------------|------------|
| N7N9              | 1.3960(17) | N5C3        | 1.2984(18) |
| N7C3              | 1.3669(17) | N8H8A       | 0.8600     |
| N7C4              | 1.3695(18) | N8H8B       | 0.8600     |
| N4N3              | 1.3604(18) | N8C4        | 1.337(2)   |
| N4C1              | 1.3458(19) | N9H9A       | 0.91(3)    |
| N4C2              | 1.4469(18) | N9H9B       | 0.93(3)    |
| N10H10A           | 0.8616     | N6C4        | 1.3151(18) |
| N10C4             | 1.3548(19) | N1N2        | 1.359(2)   |
| N10H10B           | 0.87(3)    | N1C1        | 1.3295(19) |
| N3N2              | 1.282(2)   | C3C2        | 1.490(2)   |
| N5N6              | 1.4047(19) | C2H2A       | 0.9700     |
| C3N7N9            | 124.58(12) | C2H2B       | 0.9700     |
| C3N7C4            | 105.70(11) | H10AN10H10B | 122.2      |
| N3N4C2            | 120.64(13) | C4N10H10A   | 109.6      |
| C1N4N3            | 108.40(12) | C4N10H10B   | 111.3(17)  |
| C1N4C2            | 130.96(13) | N2N3N4      | 105.95(13) |
| H8AN8H8B          | 120        | C3N6N6      | 107.42(12) |
| C1N8H8A           | 120        | C4N6N5      | 107.14(12) |
| C1N8H8B           | 120        | C1N1N2      | 105.37(13) |
| N7N9H9A           | 108.1(16)  | N3N2N1      | 112.08(13) |
| N7N9H9B           | 107.9(19)  | N7C3C2      | 123.10(12) |
| H9AN9H9B          | 109.(2)    | N5C3N7      | 110.23(12) |
| N0C4N7            | 123.92(13) | N5C3C2      | 126.66(13) |
| N6C4N7            | 109.50(12) | N1C1N8      | 126.05(14) |
| N6C4N10           | 126.52(13) | N4C2C3      | 111.17(11) |
| N8C1N4            | 125.69(14) | N4C2H2A     | 109.4      |
| N7C1N4            | 108.20(14) | N4C2H2B     | 109.4      |
| C3C2H2B           | 109.4      | C3C2H2A     | 109.4      |
| H2AC2H2B          | 108        |             |            |

**Table S8.** Selected bond lengths (Å) and angles (°) for **4**

| <b>Compound 4</b> |            |       |          |
|-------------------|------------|-------|----------|
| O1N11             | 1.2669(19) | N7C3  | 1.375(2) |
| O4N12             | 1.2676(19) | N7C4  | 1.357(2) |
| O6N12             | 1.2583(19) | N1N2  | 1.357(2) |
| O2N11             | 1.2339(19) | N1C1  | 1.337(2) |
| O3N11             | 1.2537(18) | N6N5  | 1.386(2) |
| O5N12             | 1.2350(19) | N6C4  | 1.329(2) |
| N4N3              | 1.3714(19) | N8C1  | 1.312(2) |
| N4C1              | 1.343(2)   | N10C4 | 1.316(2) |
| N4C2              | 1.468(2)   | N5C3  | 1.296(2) |
| N7N9              | 1.3982(18) | N3N2  | 1.272(2) |

|         |            |         |            |
|---------|------------|---------|------------|
| C3C2    | 1.490(2)   | C1N4N3  | 109.69(13) |
| N3N4C2  | 119.88(13) | C1N4C2  | 130.43(13) |
| C3N7N9  | 124.30(13) | C4N7N9  | 128.49(14) |
| C4N7C3  | 107.19(13) | C1N1N2  | 109.93(14) |
| O6N12O4 | 119.13(14) | O5N12O4 | 120.89(14) |
| O5N12O6 | 119.98(14) | C4N6N5  | 112.34(13) |
| O2N11O1 | 119.68(14) | O2N11O3 | 121.29(14) |
| O3N11O1 | 119.03(14) | C3N5N6  | 103.75(13) |
| N2N3N4  | 107.42(13) | N3N2N1  | 108.62(13) |
| N1C1N4  | 104.32(14) | N8C1N4  | 128.68(15) |
| N8C1N1  | 126.99(15) | N7C3C2  | 122.81(14) |
| N5C3N7  | 111.60(14) | N5C3C2  | 125.47(15) |
| N6C4N7  | 105.11(14) | N10C4N7 | 126.84(15) |
| N10C4N6 | 128.04(15) | N4C2C3  | 110.62(13) |

**Table S9.** Selected bond lengths (Å) and angles (°) for **6**

| <b>Compound 6</b> |          |           |          |
|-------------------|----------|-----------|----------|
| O3N11             | 1.250(7) | O5N12     | 1.419(7) |
| O5H5              | 0.8400   | O2N9      | 1.266(7) |
| O4N11             | 1.240(7) | N7C4      | 1.343(8) |
| O7H7A             | 0.8701   | N7C3      | 1.337(8) |
| O7H7B             | 0.8705   | N10N11    | 1.329(7) |
| N4N3              | 1.350(7) | N10C4     | 1.355(8) |
| N4C1              | 1.342(8) | N12H12A   | 0.8806   |
| N4C2              | 1.457(8) | N12H12B   | 0.8798   |
| N5N6              | 1.384(8) | N12H12C   | 1.08(10) |
| N5C3              | 1.306(8) | O6H6A     | 0.8689   |
| O1N9              | 1.241(8) | O6H6B     | 0.8701   |
| N1H1              | 0.8800   | C3C2      | 1.496(9) |
| N1N2              | 1.365(8) | C2H2A     | 0.9900   |
| N1C1              | 1.327(8) | C2H2B     | 0.9900   |
| N6C4              | 1.369(8) | N8N9      | 1.297(8) |
| N3N2              | 1.283(8) | N8C1      | 1.368(8) |
| N12O5H5           | 109.5    | C1N1N2    | 106.4(5) |
| H7AO7H7B          | 109.5    | C4N6N5    | 108.2(5) |
| N3N4C2            | 119.8(5) | N2N3N4    | 105.8(5) |
| C1N4N3            | 109.9(5) | N9N8C1    | 117.0(6) |
| C1N4C2            | 130.3(5) | C3N7C4    | 104.1(5) |
| C3N5N6            | 103.3(5) | N3N2N1    | 111.1(5) |
| N2N1H1            | 126.8    | N11N10C4  | 117.6(6) |
| C1N1H1            | 126.8    | O3N11N10  | 122.1(6) |
| O4N11O3           | 122.0(6) | O5N12H12A | 109      |
| O4N11N10          | 115.8(5) | O5N12H12B | 110.6    |
| O2N9N8            | 115.8(6) | O5N12H12C | 115.(6)  |

|             |          |             |          |
|-------------|----------|-------------|----------|
| O1N9O2      | 119.5(6) | H12AN12H12B | 109.5    |
| O1N9N8      | 124.7(6) | H12AN12H12C | 101.5    |
| H12BN12H12C | 111.1    | N7C4N10     | 119.4(6) |
| H6AO6H6B    | 104.6    | N10C4N6     | 131.8(6) |
| N7C4N6      | 108.8(6) | N5C3N7      | 115.5(6) |
| N5C3C2      | 121.4(6) | N4C2C3      | 113.7(5) |
| N7C3C2      | 123.0(6) | N4C2H2A     | 108.8    |
| N4C1N8      | 116.9(6) | N4C2H2B     | 108.8    |
| N1C1N4      | 106.8(6) | C3C2H2A     | 108.8    |
| N1C1N8      | 136.4(6) | C3C2H2B     | 108.8    |
| H2AC2H2B    | 107.7    |             |          |

**Table S10.** Selected bond lengths (Å) and angles (°) for **7**

| <b>Compound 7</b> |            |               |            |
|-------------------|------------|---------------|------------|
| K2K2i             | 4.0899(18) | K2O6i         | 2.7678(18) |
| K2K2ii            | 4.0899(18) | K2O6          | 2.6787(17) |
| K2K2iii           | 4.645(3)   | K2O4iii       | 2.8596(19) |
| K2O4iv            | 2.8358(17) | K2O4          | 2.7334(19) |
| K2O3iii           | 2.9326(18) | K2N7v         | 3.0597(19) |
| K2N11iii          | 3.289(2)   | K1N1          | 2.8307(19) |
| K2N3v             | 3.013(2)   | K1N9vi        | 3.258(2)   |
| K2H6B             | 3.08(3)    | O3N11         | 1.2563(18) |
| K1K1i             | 4.0899(18) | O6H6A         | 0.80(3)    |
| K1K1ii            | 4.0899(18) | O6H6B         | 0.81(3)    |
| K1K1vi            | 4.779(2)   | O4N11         | 1.255(2)   |
| K1O5i             | 2.7965(19) | O5H5A         | 0.86(3)    |
| K1O5              | 2.7313(18) | O5H5B         | 0.83(4)    |
| K1O2vi            | 2.8640(19) | O2N9          | 1.259(2)   |
| K1O2vii           | 2.827(2)   | N4N3          | 1.3390(19) |
| K1O1vi            | 2.8819(19) | N4C1          | 1.348(2)   |
| K1O1              | 2.775(2)   | N4C2          | 1.457(2)   |
| N5N6              | 1.359(2)   | N5C3          | 1.312(2)   |
| N7C4              | 1.338(2)   | N7C3          | 1.357(2)   |
| N6C4              | 1.343(2)   | N11N10        | 1.312(2)   |
| N10C4             | 1.381(2)   | O1N9          | 1.235(2)   |
| N1N2              | 1.358(2)   | N1C1          | 1.333(2)   |
| N8N9              | 1.313(2)   | N8C1          | 1.364(2)   |
| N2N3              | 1.293(2)   | C3C2          | 1.486(2)   |
| C2H2A             | 0.9900     | C2H2B         | 0.9900     |
| K2iiK2K2iii       | 79.19(3)   | O4ivK2O4iii   | 75.27(5)   |
| K2iK2K2iii        | 100.81(3)  | O4ivK2N7v     | 116.61(5)  |
| K2iK2K2ii         | 180        | O3iiiK2N7v    | 112.77(5)  |
| K2iiK2H6B         | 49.0(5)    | O4ivK2N11iii  | 79.13(5)   |
| K2iK2H6B          | 131.0(5)   | O3iiiK2N11iii | 22.37(4)   |

|               |           |              |           |
|---------------|-----------|--------------|-----------|
| K2iiiK2H6B    | 76.2(5)   | O4ivK2N3v    | 71.29(5)  |
| O4ivK2K2ii    | 134.19(3) | O3iiiK2N3v   | 66.34(5)  |
| O3iiiK2K2iii  | 72.78(4)  | O4ivK2H6B    | 163.1(5)  |
| O4ivK2K2iii   | 87.96(4)  | O3iiiK2H6B   | 90.6(5)   |
| O4ivK2K2i     | 45.81(4)  | O6K2K2i      | 137.84(4) |
| O3iiiK2K2ii   | 43.90(3)  | O6K2K2iii    | 87.42(5)  |
| O3iiiK2K2i    | 136.10(3) | O6iK2K2iii   | 103.51(5) |
| O4ivK2O3iii   | 90.29(5)  | O6K2K2ii     | 42.16(4)  |
| O6iK2K2ii     | 139.49(3) | O6iK2K2i     | 40.51(3)  |
| O6K2O3iii     | 85.94(5)  | O6K2O4iv     | 174.74(4) |
| O6iK2O4iv     | 86.20(5)  | O6iK2O3iii   | 175.01(4) |
| O6K2O6i       | 97.33(6)  | O6iK2O4iii   | 131.31(5) |
| O6K2O4        | 75.61(5)  | O6K2O4iii    | 99.47(6)  |
| O6iK2N7v      | 72.04(5)  | O6K2N7v      | 68.35(5)  |
| O6iK2N11iii   | 152.77(4) | O6K2N11iii   | 96.09(5)  |
| O6K2N3v       | 110.35(5) | O6iK2N3v     | 115.65(5) |
| O6K2H6B       | 14.0(5)   | O6iK2H6B     | 91.7(5)   |
| O4iiiK2K2i    | 109.81(4) | O4iiiK2K2ii  | 70.19(4)  |
| O4K2K2i       | 87.95(5)  | O4K2K2ii     | 92.05(5)  |
| O4K2K2iii     | 34.72(3)  | O4K2K2       | 32.99(3)  |
| O4K2O3iii     | 104.39(5) | O4iiiK2O3iii | 44.07(4)  |
| O4K2O4iv      | 101.85(5) | O4K2O6i      | 72.94(5)  |
| O4K2O4iii     | 67.71(5)  | O4iiiK2N7v   | 156.07(4) |
| O4K2N7v       | 124.92(4) | O4K2N11iii   | 87.69(5)  |
| O4iiiK2N11iii | 22.18(4)  | O4iiiK2N3v   | 100.49(5) |
| O4K2N3v       | 167.85(4) | O4iiiK2H6B   | 93.9(5)   |
| O4K2H6B       | 61.7(5)   | N7vK2K2iii   | 154.09(3) |
| N7vK2K2i      | 91.89(4)  | N7vK2K2ii    | 88.11(4)  |
| N7vK2N11iii   | 135.13(5) | N7vK2H6B     | 78.4(5)   |
| N11iiiK2K2ii  | 57.84(4)  | N11iiiK2K2i  | 122.16(4) |
| N11iiiK2K2iii | 53.58(4)  | N11iiiK2H6B  | 95.8(5)   |
| N3vK2K2i      | 93.74(5)  | N3vK2K2ii    | 86.26(5)  |
| N3vK2K2iii    | 133.42(4) | N3vK2N7v     | 67.09(5)  |
| N3vK2N11iii   | 81.22(5)  | N3vK2H6B     | 124.2(5)  |
| K1iiK1K1i     | 180       | K1iK1K1vi    | 91.53(3)  |
| K1iiK1K1vi    | 88.47(3)  | O5iK1K1vi    | 133.17(4) |
| O05K1K1vi     | 131.34(4) | O5iK1K1i     | 41.67(4)  |
| O5iK1K1ii     | 138.33(4) | O5K1K1i      | 137.10(4) |
| O5K1K1ii      | 42.90(4)  | O5K1O5i      | 95.43(6)  |
| O5iK1O2vi     | 135.05(5) | O5K1O2vii    | 134.20(5) |
| O5K1O6vi      | 69.02(5)  | O5iK1O2vii   | 68.67(5)  |
| O5iK1O1vi     | 146.67(5) | O5K1O1       | 143.69(5) |
| O5K1O1vi      | 108.62(6) | O5K1N1       | 105.36(6) |
| O5iK1N1       | 75.32(6)  | O5K1N9vi     | 90.46(5)  |

|             |            |             |            |
|-------------|------------|-------------|------------|
| O5iK1N9vi   | 143.26(5)  | O2viK1K1ii  | 135.58(4)  |
| O2viK1K1vi  | 75.51(4)   | O2viiK1K1vi | 77.58(4)   |
| O2viK1K1ii  | 43.70(4)   | O2viK1K1i   | 136.30(4)  |
| O2viiK1K1i  | 44.42(4)   | O2viiK1O2vi | 91.88(5)   |
| O2viiK1O1vi | 78.00(6)   | O2viK1O1vi  | 44.24(5)   |
| O2viiK1N1   | 110.92(5)  | O2viiK1N9vi | 81.34(6)   |
| O2viK1N9vi  | 22.57(4)   | O1K1K1i     | 70.98(5)   |
| O1K1K1ii    | 109.02(5)  | O1viK1K1vi  | 31.68(3)   |
| O1viK1K1i   | 110.98(5)  | O1viK1K1ii  | 69.02(5)   |
| O1K1K1vi    | 33.05(3)   | O1K1O5i     | 108.08(5)  |
| O1K1O2vii   | 81.12(5)   | O1K1O2vi    | 108.24(5)  |
| O1K1O1vi    | 64.73(5)   | O1K1N1      | 57.12(5)   |
| O1viK1N9vi  | 22.14(4)   | O1K1N9vi    | 86.86(5)   |
| N1K1K1ii    | 110.49(5)  | N1K1K1vi    | 88.09(5)   |
| N1K1K1i     | 69.51(5)   | N1K1O2vi    | 148.48(5)  |
| N1K1O1vi    | 117.87(5)  | N1K1N9vi    | 137.51(5)  |
| N9viK1K1vi  | 53.81(4)   | N9viK1K1ii  | 57.15(4)   |
| N9viK1K1i   | 122.85(4)  | K2ivO3K2iii | 90.29(5)   |
| N11O3K2iv   | 120.39(9)  | N11O3K2iii  | 94.98(9)   |
| K2O6K2ii    | 97.33(5)   | K2O6H6A     | 112.(2)    |
| K2O6H6A     | 115.(2)    | K2O6H6B     | 112.6(19)  |
| K2O6H6B     | 108.1(19)  | H6AO6H6B    | 110.(3)    |
| K2O4K2iii   | 112.29(5)  | N11O4K2     | 139.34(10) |
| N11O4K2iii  | 98.52(9)   | K1O5K1ii    | 95.43(6)   |
| K1iiO5H5A   | 110.0(18)  | K1O5H5A     | 124.5(18)  |
| K1iiO5H5B   | 101.(2)    | K1O5H5B     | 117.(2)    |
| H5AO5H5B    | 106.(3)    | K1viiO2K1vi | 91.88(5)   |
| N9O2K1vi    | 96.58(10)  | N9O2K1vii   | 117.68(12) |
| N3N4C1      | 109.16(13) | N3N4C2      | 121.38(13) |
| C1N4C2      | 129.40(14) | C3N5N6      | 102.65(14) |
| C4N7K2v     | 137.27(11) | C4N7C3      | 102.44(13) |
| C3N7K2v     | 120.29(10) | C4N7N8      | 109.80(13) |
| O3N11K2iii  | 62.66(8)   | O311N10     | 123.46(14) |
| O4N11K2iii  | 59.30(8)   | O4N11O3     | 119.89(13) |
| O4N11N10    | 116.65(13) | N10N11K2iii | 164.61(10) |
| N11N10C4    | 116.68(13) | K1O1K1vi    | 115.27(5)  |
| N9O1K1vi    | 96.31(11)  | N9O1K1      | 148.35(12) |
| N2N1K1      | 121.11(10) | C1N1K1      | 131.26(11) |
| C1N11N2     | 105.18(13) | N9N8C1      | 116.73(14) |
| N3N2N1      | 111.84(13) | N4N3K2v     | 121.76(10) |
| N2N3K2v     | 126.72(11) | N2N3N4      | 105.97(13) |
| O2N9K1vi    | 60.84(9)   | O2N9N8      | 115.19(14) |
| O1N9K1vi    | 61.55(9)   | O1N9O2      | 120.31(15) |
| O1N9N8      | 124.50(15) | N8N9K1vi    | 164.07(12) |



|          |            |         |            |
|----------|------------|---------|------------|
| N7C4N6   | 109.76(14) | N7C4N10 | 119.50(14) |
| N6C4N10  | 130.73(14) | N5C3N7  | 115.35(15) |
| N5C3C2   | 121.19(15) | N7C3C2  | 123.46(14) |
| N4C1N8   | 115.84(14) | N1C1N4  | 107.84(14) |
| N1C1N8   | 136.28(15) | N4C2C3  | 111.47(13) |
| N4C2H2A  | 109.3      | N4C2H2B | 109.3      |
| C3C2H2A  | 109.3      | C3C2H2B | 109.3      |
| H2AC2H2B | 108        |         |            |

(i)  $-1+x, y, z$ ; (ii)  $1+x, y, z$ ; (iii)  $2-x, 2-y, 1-z$ ; (iv)  $1-x, 2-y, 1-z$ ; (v)  $1-x, 1-y, 1-z$ ; (vi)  $1-x, -y, -z$ ; (vii)  $-x, -y, -z$

## 5. Detailed calculation procedure of IGM analyses and the iso-surfaces of IGM analyses of 2(a), 3(b), 4(c), 6(d) and 7(e)

Single point calculations of each crystal repeat units were performed at the B3LYP-D3(BJ)/TZVP level of theory using the ORCA quantum-chemistry program package <sup>1</sup>. The wave function files generated from the single-point calculations were loaded with Multiwfn and the lattice point data for the  $\delta g_{\text{inter}}$  function was generated <sup>2</sup>. Finally, the IGM isosurface maps were generated using VMD software.

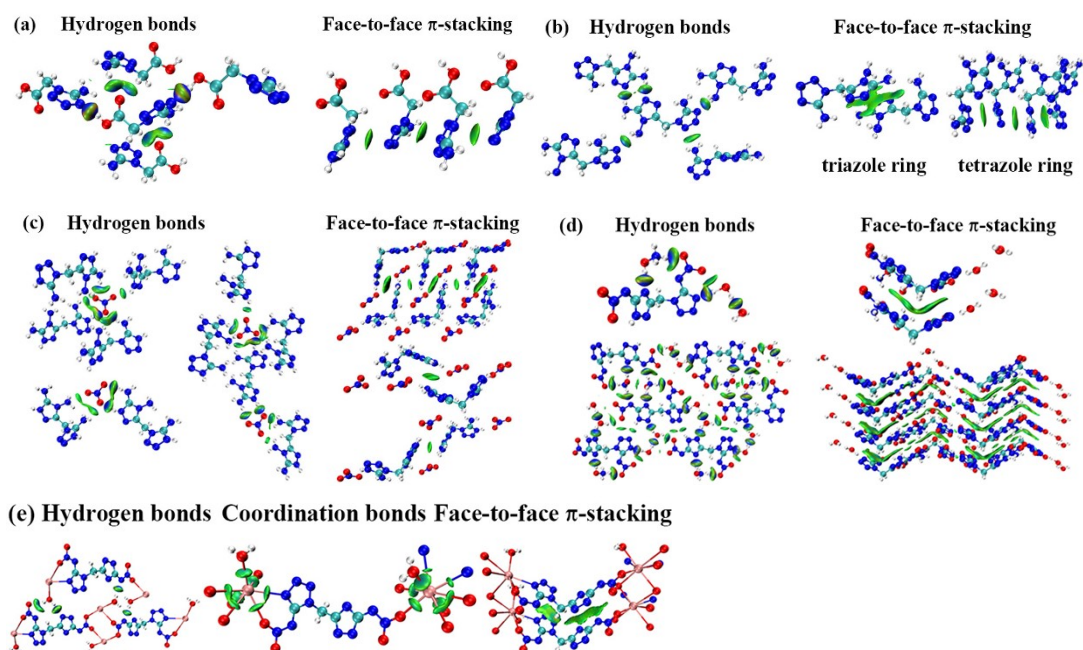

**Figure. S1** The iso-surfaces of IGM analyses of 2(a), 3(b), 4(c), 6(d) and 7(e) adopted from their unit cells.

## 6. Detailed calculation of enthalpies of formation

**Table S11.** Detailed calculation of enthalpies of formation of complexes 4, 6 and 7

|          | Calc. Density (g/cm <sup>3</sup> ) | Formula                                                                     | Q <sub>v</sub> (kJ / mol) |
|----------|------------------------------------|-----------------------------------------------------------------------------|---------------------------|
| <b>4</b> | 1.715                              | C <sub>4</sub> H <sub>10</sub> N <sub>12</sub> O <sub>6</sub>               | 3999                      |
| <b>6</b> | 1.724                              | C <sub>4</sub> H <sub>11</sub> N <sub>12</sub> O <sub>7</sub>               | 4003                      |
| <b>7</b> | 1.838                              | C <sub>4</sub> H <sub>6</sub> K <sub>2</sub> N <sub>11</sub> O <sub>6</sub> | 2301                      |
|          | $\Delta n_g$                       | $\Delta_c H$ (kJ/mol)                                                       | $\Delta_f H$ (kJ/mol)     |

|                                                                  |      |        |       |
|------------------------------------------------------------------|------|--------|-------|
| $C_4H_{10}N_{12}O_6 + 3.5 O_2 = 5H_2O + 4 CO_2 + 6 N_2$          | 6.5  | 4027.1 | 667.7 |
| $C_4H_{11}N_{12}O_7 + 3.25 O_2 = 5.5 H_2O + 4 CO_2 + 6 N_2$      | 6.75 | 4030.7 | 473.5 |
| $C_4H_6K_2N_{11}O_6 + 3 O_2 = 3H_2O + 4 CO_2 + 5.5 N_2 + 1 K_2O$ | 6.5  | 2324.1 | 272.5 |

The standard enthalpies of formation ( $\Delta_f H^\theta$ ) were calculated according to Hess's law:

$$\Delta_f H(C_4H_{10}N_{12}O_6, s) = 5 \Delta_f H(H_2O, l) + \Delta_f H(CO, g) + 3 \Delta_f H(C, s) + 6 \Delta_f H(N_2, g) - \Delta_c H(C_4H_{10}N_{12}O_6)$$

$$\Delta_f H(C_4H_{11}N_{12}O_7, s) = 5.5 \Delta_f H(H_2O, l) + 1.5 \Delta_f H(CO, g) + 2.5 \Delta_f H(C, s) + 6 \Delta_f H(N_2, g) - \Delta_c H(C_4H_{11}N_{12}O_7)$$

$$\Delta_f H(C_4H_6K_2N_{11}O_6, s) = 3 \Delta_f H(H_2O, l) + \Delta_f H(K_2O, g) + 2 \Delta_f H(CO, g) + 2 \Delta_f H(C, s) + 5.5 \Delta_f H(N_2, g) - \Delta_c H(C_4H_6K_2N_{11}O_6)$$

## 7. Schematic diagram of electric initiation device

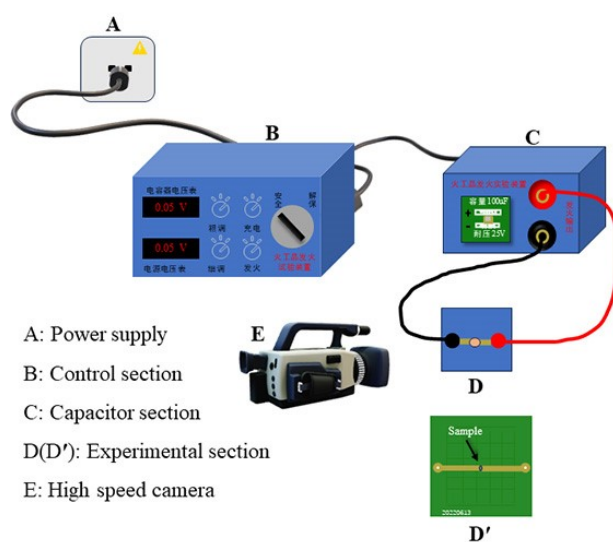

Figure S2 The schematic diagram of the device and some of its parameters

## 8. Gif picture of ignition of RDX

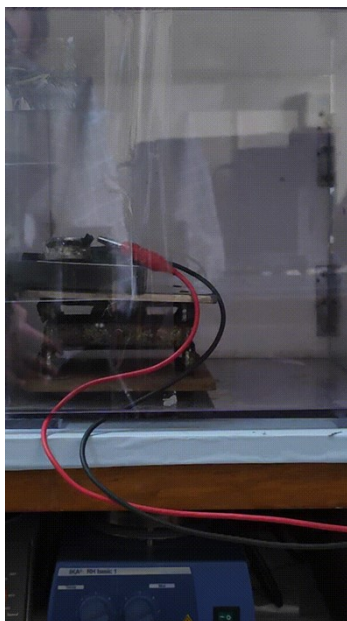

**Figure S3** The picture of ignition of RDX

## 9. References.

- [1] Neese F. Software update: The ORCA program system—Version 5.0[J]. *Wiley Interdisciplinary Reviews: Computational Molecular Science*, 2022, 12(5): e1606.
- [2] Lu T, Chen Q. Independent gradient model based on Hirshfeld partition: A new method for visual study of interactions in chemical systems. *J. Comput. Chem.*, **2022**, 43(8): 539-555. DOI: 10.1002/jcc.2681212
